# Supplementary material
Source: PubMed Central journal article supplement (PMC4475951)
Supplement: pnas.201414374SI.pdf [file pnas.201414374SI.pdf]

# Supporting Information

Reyers et al. 10.1073/pnas.1414374112

Table S1. Social and ecological factors and drivers of change identified during conceptual model development

| Case study                               | Ecosystem features and processes                                                                                                    | Social factors                                                                                                                                                                                                  | Drivers                                                                                                                                                                                            | Scenarios explored                                                                                                                                                                                                                                                                                                                                                    | Models and input data used, as well as impact analysis method; for details on calibration and refinements, see ref. 1                                                                                                                                                                                                                                                                                                                            |
|------------------------------------------|-------------------------------------------------------------------------------------------------------------------------------------|-----------------------------------------------------------------------------------------------------------------------------------------------------------------------------------------------------------------|----------------------------------------------------------------------------------------------------------------------------------------------------------------------------------------------------|-----------------------------------------------------------------------------------------------------------------------------------------------------------------------------------------------------------------------------------------------------------------------------------------------------------------------------------------------------------------------|--------------------------------------------------------------------------------------------------------------------------------------------------------------------------------------------------------------------------------------------------------------------------------------------------------------------------------------------------------------------------------------------------------------------------------------------------|
| 1: Flood on a lakeside urban plain       | Soil type and condition, topography, geology, estuary berm height, lake water levels, infiltration, storage, run-off, estuary flows | Elevation of infrastructure, location of infrastructure, forestry area and management, value of assets, insurance claims, infrastructure damage costs                                                           | Rainfall and temperature, vegetation cover and condition, invasive nonnative plant spread, wildfire, estuary mouth changes, forestry clearing practices                                            | Baseline: current land cover and climate<br>Moderate: clear-felling and nonreplanting of the plantation, current climate<br>Severe: burning down of the plantation by a severe wildfire with replacement by degraded fynbos, current climate<br>Climate change: current land cover, future climate                                                                    | Agrohydrological modeling system used to simulate daily flows (2)<br>Soils and vegetation data (3)<br>Thirty-meter resolution land cover data (4)<br>Daily temperature data: current (1961–1990) and future (2021–2050) from regional climate model (CCAM) (5)<br>Daily rainfall data for the same periods (6)<br>Exceedance probabilities for extreme flows from the simulated flow record calculated with the Log Pearson III distribution (7) |
| 2: Wildfire in a rapidly developing area | Vegetation type and distribution, fire weather (temperature, wind, humidity), landscape structure, lightning                        | Population density, road network, fire breaks, exposed wildland–urban interface, firefighting resources and distance, prescribed burning regimes, exposed flammable infrastructure and assets, fire regulations | Spread of invasive nonnative vegetation, change in flammable vegetation, increases in ignition sources, climate change, human population growth, road network changes, fragmentation of urban edge | Baseline: nonnative trees and shrubs cleared and maintained at levels below 5% cover, current climate<br>Moderate: current levels of invasion by nonnative trees, current climate<br>Severe: nonnative trees invade to maximum potential, current climate<br>Climate change: nonnative trees and shrubs are cleared and maintained at levels below 5%, future climate | Equation to estimate changes in fireline intensity across 106 spatial assessment units (8, 9)<br>McArthur's Forest Fire Danger Index (10) to estimate rates of fire spread<br>Data on nonnative invasive plant distribution and spread rates ( <i>Pinus</i> and <i>Hakea</i> species) (11–13)<br>Daily data temperature, wind speed, rainfall, and relative humidity from CCAM (5) for periods as for flood study                                |

**Table S1. Cont.**

| Case study                           | Ecosystem features and processes                                                                                                                                                             | Social factors                                                                                                                                              | Drivers                                                                                                               | Scenarios explored                                                                                                                                                                                                                                                                                                                                                                                                                                                                                                                                          | Models and input data used, as well as impact analysis method; for details on calibration and refinements, see ref. 1                                                                                                                                                                                                                                                                                                                                                                                                                                                                                                                                                                      |
|--------------------------------------|----------------------------------------------------------------------------------------------------------------------------------------------------------------------------------------------|-------------------------------------------------------------------------------------------------------------------------------------------------------------|-----------------------------------------------------------------------------------------------------------------------|-------------------------------------------------------------------------------------------------------------------------------------------------------------------------------------------------------------------------------------------------------------------------------------------------------------------------------------------------------------------------------------------------------------------------------------------------------------------------------------------------------------------------------------------------------------|--------------------------------------------------------------------------------------------------------------------------------------------------------------------------------------------------------------------------------------------------------------------------------------------------------------------------------------------------------------------------------------------------------------------------------------------------------------------------------------------------------------------------------------------------------------------------------------------------------------------------------------------------------------------------------------------|
| 3: Drought and hops production       | Soil, landcover, run-off, ground water recharge, geology, topography, sedimentation, evaporation,                                                                                            | Ground water abstraction, dam infrastructure, boreholes, location of farms, labor and input costs, market, labor movements                                  | Nonnative invasive plant spread, rainfall changes, landcover change, increases in surface and groundwater abstraction | Baseline: indigenous natural vegetation with no invasive nonnative trees, current climate<br>Moderate: nonnative trees invade to maximum potential impacts measured as effects on low flow drought intensity (70% probability of exceedance), current climate<br>Severe: nonnative trees invade to maximum potential impacts measured as effects on very low flow drought intensity (90% probability of exceedance), current climate<br>Climate change: indigenous natural vegetation with no invasive nonnative plants or human activities, future climate | Flow simulations used to develop flow duration curves were derived using the Pitman model (14)<br>Data on soil depths, soil texture, topographic slope, and subsurface geological conditions extracted from agricultural land types database <a href="http://www.agis.agric.za">www.agis.agric.za</a><br>An ecological module estimated invasive nonnative tree water use (15), which links back to the Pitman model to predict changes in streamflow<br>Monthly temperature and rainfall data from CCAM (5) for periods as for flood study with modifications in (1)<br>Changes in flow compared using flow duration curves, focusing on flows produced at >70% and >90% exceedance range |
| 4: Storm-waves on an urbanized coast | Wave power and height, wave run-up, geomorphology, elevation, erosion potential, height of foredune, sea water level, sediment transport, sea storms, protection from prevailing wave energy | Distance of nearest infrastructure to shore, shoreline management, beach maintenance, dredging, ensured assets, insurance claims, provincial damage reports | Sea level rise, erosion, coastal hardening, land cover change, foredune height change, wind, tides                    | Baseline: current beach slope, current climate<br>Moderate: 3° increase in beach slope, current climate<br>Severe: 6° increase in beach slope, current climate<br>Climate change: current beach slope, future climate                                                                                                                                                                                                                                                                                                                                       | Numerical wave model (16) to translate offshore wave data to inshore wave conditions<br>Wave run-up model (17) to calculate wave run-up elevations at 0.5 km points along the coastline<br>Data on wave height, period, and direction, from the National Centre for Environmental Prediction (NCEP) [ <a href="http://www.nco.ncep.noaa.gov/pmb/products/wave/#WWW3ENS">www.nco.ncep.noaa.gov/pmb/products/wave/#WWW3ENS</a> ]<br>Beach and inshore slopes from the South African Navy's bathymetric charts<br>Future sea-level projections from ref. 18, and offshore extreme waves from metocean climate modeling (19)                                                                   |

The table also lists scenarios, models, and input data sources used. CCAM, conformal-cubic atmospheric model.

1. Nel JL, et al. (2014) Natural hazards in a changing world: A case for ecosystem-based management. *PLoS ONE* 9(5):e95942.  
2. Jewitt G, Schulze R (1999) Verification of the ACRU model for forest hydrology applications. *Water SA* 25:483–489.

3. Warburton ML, Schulze RE, Jewitt GPW (2010) Confirmation of ACRU model results for applications in land use and climate change studies. *Hydrol Earth Syst Sci* 14:2399–2414.
4. Van den Berg E, Plarre C, van den Berg H, Thompson M (2008) *The South African National Land Cover 2000* (Agricultural Research Council and Council for Scientific and Industrial Research, Pretoria, South Africa).
5. Mcgregor J, Dix M (2008) *High Resolution Simulation of the Atmosphere and Ocean*, eds Hamilton K, Ohfuchi W (Springer, New York), pp 51–76.
6. Lynch S (2004) *Development of a Raster Database of Annual, Monthly and Daily Rainfall for Southern Africa* (Water Research Commission, Pretoria, South Africa).
7. US Interagency Advisory Committee on Water Data (1982) *Guidelines for Determining Flood Flow Frequency*. (US Geological Survey, Reston, VA), Bulletin 1.
8. Byram GM (1959) *Forest Fire: Control and Use*, ed Davis KP (McGraw-Hill, New York), pp 155–182.
9. Mercer DE, Prestemon JP (2005) Comparing production function models for wildfire risk analysis in the wildland-urban interface. *Forest Policy and Economics* 7(5):782–795.
10. Noble IR, Gill AM, Bary GAV (1980) McArthur's fire-danger meters expressed as equations. *Austral Ecol* 5:201–203.
11. Vromans D, Maree K, Holness S, Job N, Brown A (2010) The Garden Route Biodiversity Sector Plan for the George, Knysna and Bitou Municipalities: Supporting Land-Use Planning and Decision-Making in Critical Biodiversity Areas and Ecological Support Areas for Sustainable Development (South African National Parks, Knysna, South Africa).
12. Richardson D, Brown P (1986) Invasion of mesic mountain fynbos by *Pinus radiata*. *S Afr J Bot* 52:529–536.
13. Higgins SJ, Richardson DM, Cowling RM (2000) Using a dynamic landscape model for planning the management of alien plant invasions. *Ecol Appl* 10:1833–1848.
14. Middleton B, Bailey A (2009) *Water Resources of South Africa 2005 Study* (Water Research Commission, Pretoria, South Africa).
15. Le Maitre DC, Van Wilgen BW, Chapman RA, McKelly DH (1996) Invasive plants and water resources in the Western Cape Province, South Africa: Modelling the consequences of a lack of management. *J Appl Ecol* 33:161–172.
16. Booij N, Ris R, Holthuijsen LH (1999) A third-generation wave model for coastal regions. Part I: Model description and validation. *J Geophys Res* 104:7649–7666.
17. Nielsen P, Hanslow DJ (1991) Wave runup distributions on natural beaches. *J Coast Res* 7:1139–1152.
18. Rossouw M, Theron A (2012) *Maritime Transport and the Climate Change Challenge*, eds Asariotis R, Benamara H (Earthscan, Abingdon, UK).
19. Mori N, Yasuda T, Mase H, Tom T, Oku Y (2010) Projection of extreme wave climate change under global warming. *Hydrol Res Lett* 4:15–19.
